# Supplementary material for: The Role of UBR2 in Triple-Negative Breast Cancer and Its Implications for Immune Checkpoint Blockade Therapy
Source: Research Square preprint supplement (doi:10.21203/rs.3.rs-5746807/v1), 2025-01-20
Supplement: Supplementary file 1 [file 52cacb7c7e4c34470eb122c9.xlsx]

## Sheet: Sheet1
rank	Name	ID	S	rmsd_refine	Synonym	CAS	Formula	MolWt	Pathways	Target	Receptor	Bioactivity	Reference	PLIF_pronum	PLIF_raw	FP:PLIF	PLIF_ligidx
1	14-Hydroxy sprengerinin C	T4S1247	-8.169	3.4921		1111088-89-1	C44H70O17	871.02	Others	Others	Others	14-Hydroxy sprengerinin C is a natural product from Ophiopogon japonicus.		1	[[1,8,25,117,46,46,46,46,46,46],[838,407,407,783,809,811,810,808,806,807],[150,121,121,145,148,148,148,148,148,148],[1,1,1,3,10,10,10,10,10,10],[1.4,0.5,1,0.7,0.5,0.5,0.5,0.5,0.5,0.5]]	16 19 11 7	[[8,25],117,[46,46,46,46,46,46],1]
2	A-1210477	T2632	-8.017	2.47855	A1210477; A 1210477; A-1210477	1668553-26-1	C46H55N7O7S	850.04	Apoptosis	Apoptosis; Bcl	Apoptosis; Bcl-2 Family; Mcl-1	A-1210477 is an effective and specific MCL-1 and Bcl-2 inhibitor (Ki/IC50: 0.454/26.2 nM).	Leverson JD, et al. Cell Death Dis. 2015, 6:e1590. doi: 10.1038/cddis.2014.561.	1	[[50,58,57,55,53,51,96,112,103,101,99,97],[773,773,773,773,773,773,774,774,774,774,774,774],[144,144,144,144,144,144,144,144,144,144,144,144],[10,10,10,10,10,10,10,10,10,10,10,10],[0.5,0.5,0.5,0.5,0.5,0.5,0.5,0.5,0.5,0.5,0.5,0.5]]	24	[[50,58,57,55,53,51,96,112,103,101,99,97]]
3	20(S)-Ginsenoside Rg3	T3402	-8.195	3.42849	Ginsenoside Rg3; Rg3; S-Ginsenoside Rg3; 20(S)-Ginsenoside-Rg3; 20S-Ginsenoside Rg3	14197-60-5	C42H72O13	785.02	Angiogenesis; JAK/STAT signaling; Tyrosine Kinase/Adaptors; Immunology/Inflammation; Neuroscience; Membrane transporter/Ion channel; Metabolism; NF-κB	Beta Amyloid; COX; EGFR; Endogenous Metabolite; NF-κB; Potassium Channel; Sodium Channel	Amyloid-β; COX; EGFR; Endogenous Metabolite; NF-κB; Potassium Channel; Sodium Channel	Ginsenoside Rg3 possess an ability to inhibit the lung metastasis of tumor cells via inhibition of the adhesion and invasion of tumor cells. It inhibits the proliferation of human umbilical vein endothelial cells(HUVEC) and has anti-angiogenesis activities.	Joo EJ, et al. Chem Biol Interact. 2015 May 25;233:25-34.	1	[[42,75,92,100,104,71],[838,237,751,783,783,702],[150,109,142,145,145,139],[1,1,3,3,3,2],[1.1,1.2,0.6,0.6,1.9,1.2]]	35 3 32 19 25 7	[75,71,92,[100,104],104,42]
4	A40926	T2692	-8.049	4.47977	Dalbavancin Impurity	102961-72-8	C83H88Cl2N8O29	1732.53	Microbiology/virology	Antibacterial	antibacterial; Bacterial	Dalbavancin Impurity is effective against Gram positive bacteria.	Smith JR, Roberts KD, Rybak MJ. Infect Dis Ther. 2015 Sep;4(3):245-58.	1	[[26,114,118,122,99,100,124,126,129,131],[790,393,407,869,811,811,811,811,811,811],[146,120,121,153,148,148,148,148,148,148],[3,1,1,1,10,10,10,10,10,10],[1.1,0.6,1,1.8,0.5,0.5,0.5,0.5,0.5,0.5]]	15 16 33 11 27 30	[114,118,26,[99,100,124,126,129,131],122,122]
5	AP-III-a4	T6759	-8.075	2.94363	ENOblock	1177827-73-4	C31H44ClFN8O3	631.18	Metabolism	Glucokinase	enolase	AP-III-a4 (ENOblock) is the first nonsubstrate analogue inhibitor of enolase with IC50 of 0.576 μM.	Jung DW, et al. ACS Chem Biol. 2013, 8(6), 1271-1282.	1	[[62,84,47,55,53,52,50,48],[838,407,801,801,801,801,801,801],[150,121,148,148,148,148,148,148],[1,1,10,10,10,10,10,10],[1.9,2,0.9,0.9,0.9,0.9,0.9,0.9]]	16 42 11 7 8	[84,84,[47,55,53,52,50,48],62,62]
6	11-oxo-mogroside V	T3785	-8.578	3.671	11-oxo Mogroside V	126105-11-1	C60H100O29	1285.4	Immunology/Inflammation; Metabolism; NF-κB	Reactive Oxygen Species	Reactive Oxygen Species	11-oxo Mogroside V is a sweet tasting cucurbitane glycoside derivative of mogroside V. It has antioxidant effects against both O2- and OH- and prevents OH-induced DNA damage.	Chen WJ, et al. The antioxidant activities of natural sweeteners, mogrosides, from fruits of Siraitia grosvenori. Int J Food Sci Nutr. 2007 Nov;58(7):548-56.	1	[[78,135,160,45,134],[869,751,776,801,773],[153,142,144,148,144],[1,3,3,4,4],[2.4,0.5,0.9,1.5,0.8]]	32 57 26 9 10 27 30	[135,160,134,45,45,78,78]
7	ABT530	T5127	-8.122	5.71117	ABT 530; ABT-530; Pibrentasvir	1353900-92-1	C57H65F5N10O8	1113.18	Microbiology/virology; Proteases/Proteasome	HCV Protease	HCV NS5A	ABT-530 (Pibrentasvir) is an HCV NS5A inhibitor with EC50s ranging from 1.4-5.0 pM against HCV replicons containing NS5A from genotypes 1-6.	Ng TI, et al. In Vitro Antiviral Activity and Resistance Profile of the Next-Generation Hepatitis C Virus NS5A Inhibitor Pibrentasvir. Antimicrob Agents Chemother. 2017 Apr 24;61(5). pii: e02558-16.	1	[[48,103],[368,868],[118,153],[1,1],[3.8,1.2]]	44 48 27	[48,48,103]
8	Angiotensin II human	T7040	-8.763	5.85069	Ang II; DRVYIHPF; Hypertensin II; Angiotensin II	4474-91-3	C50H71N13O12	1046.18	Apoptosis; Endocrinology/Hormones	Apoptosis; RAAS	Angiotensin Receptor; Apoptosis; AT receptor	Angiotensin II is mediated by AT1 and AT2 receptors. AT1 and AT2 receptors have seven transmembrane glycoproteins with 30% sequence similarity.Angiotensin I convert Angiotensin II human through removing of two C-terminal residues by the enzyme angiotensin-converting enzyme (ACE).	de Gasparo M, et al. International union of pharmacology. XXIII. The angiotensin II receptors. Pharmacol Rev. 2000 Sep;52(3):415-72.	1	[[58,61,61,66,72,75,144],[895,879,895,869,407,407,783],[155,154,155,153,121,121,145],[1,1,1,1,1,1,3],[1.4,1.2,3.4,5.7,2.2,0.6,1.9]]	16 42 19 25 27 30 85 28 29	[[72,75],72,144,144,66,66,61,[58,61],61]
9	Angiotensin III, human, mouse	T7577	-8.471	2.12828	Angiotensin III, human, mouse(3TFA)	13602-53-4	C46H66N12O9	931.09	Endocrinology/Hormones	RAAS	angiotensin II receptor; Angiotensin Receptor	Angiotensin III, human, mouse(3TFA) is an endogenous angiotensin II receptor (AT2R) agonist(IC50s of 0.648 nM).	Kemp B A , Bell J F , Rottkamp D M , et al. Intrarenal Angiotensin III Is the Predominant Agonist for Proximal Tubule Angiotensin Type 2 Receptors[J]. Hypertension, 2012, 60(2):387-395.	1	[[61,66,19,131,88,94,92,91,89,119,128,126,124,122,120],[839,869,702,763,699,699,699,699,699,773,773,773,773,773,773],[150,153,139,143,139,139,139,139,139,144,144,144,144,144,144],[1,1,2,4,10,10,10,10,10,10,10,10,10,10,10],[1.1,2.6,0.5,0.7,0.8,0.8,0.8,0.8,0.8,1.1,1.1,1.1,1.1,1.1,1.1]]	3 61 46 24 43 7 27 30	[19,[88,94,92,91,89],131,[119,128,126,124,122,120],[119,128,126,124,122,120],61,66,66]
