# Supplementary material for: The Role of UBR2 in Triple-Negative Breast Cancer and Its Implications for Immune Checkpoint Blockade Therapy
Source: Research Square preprint supplement (doi:10.21203/rs.3.rs-5746807/v1), 2025-01-20
Supplement: Supplementary file 2 [file a8c0ec71c3f7ffcc5c5366d0.docx]

**
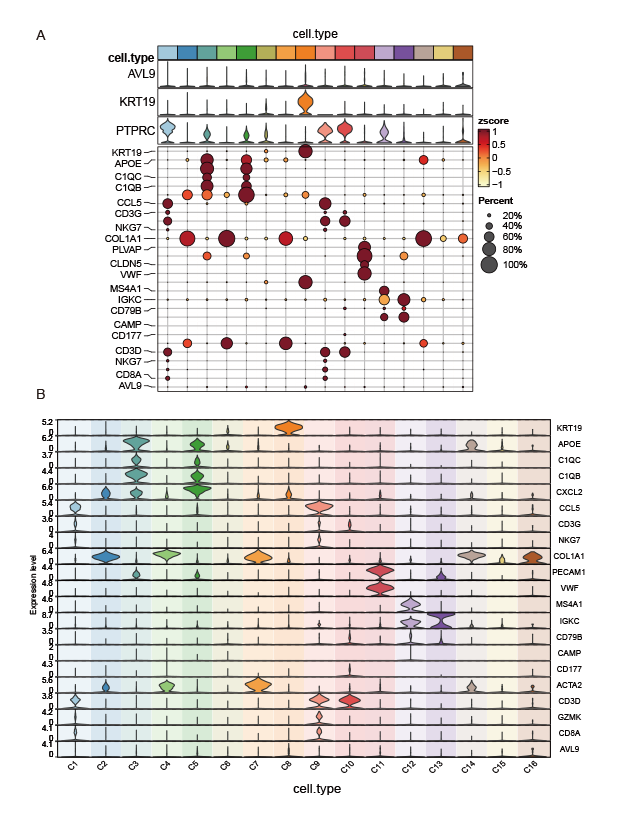
**

**Supplementary Figure 1**

**A**, Bubble plot showed a clustering analysis of the single-cell sequencing data obtained from the samples submitted for analysis. The vertical axis represents the characteristic markers of the major cell populations, while the horizontal axis shows the major cell populations and their subsets. The gene expression levels of each cell were standardized using Z-score, with the size of the bubble representing the expression intensity of the gene, and different colors indicating different cell populations.

**B**, Violin plot showed a clustering analysis of the single-cell sequencing data obtained from the samples submitted for analysis. The vertical axis represents the characteristic markers of the major cell populations, while the horizontal axis shows the major cell populations and their subsets. The gene expression levels of each cell were standardized using Z-score, with the size of the violin representing the expression intensity of the gene, and different colors indicating different cell populations.


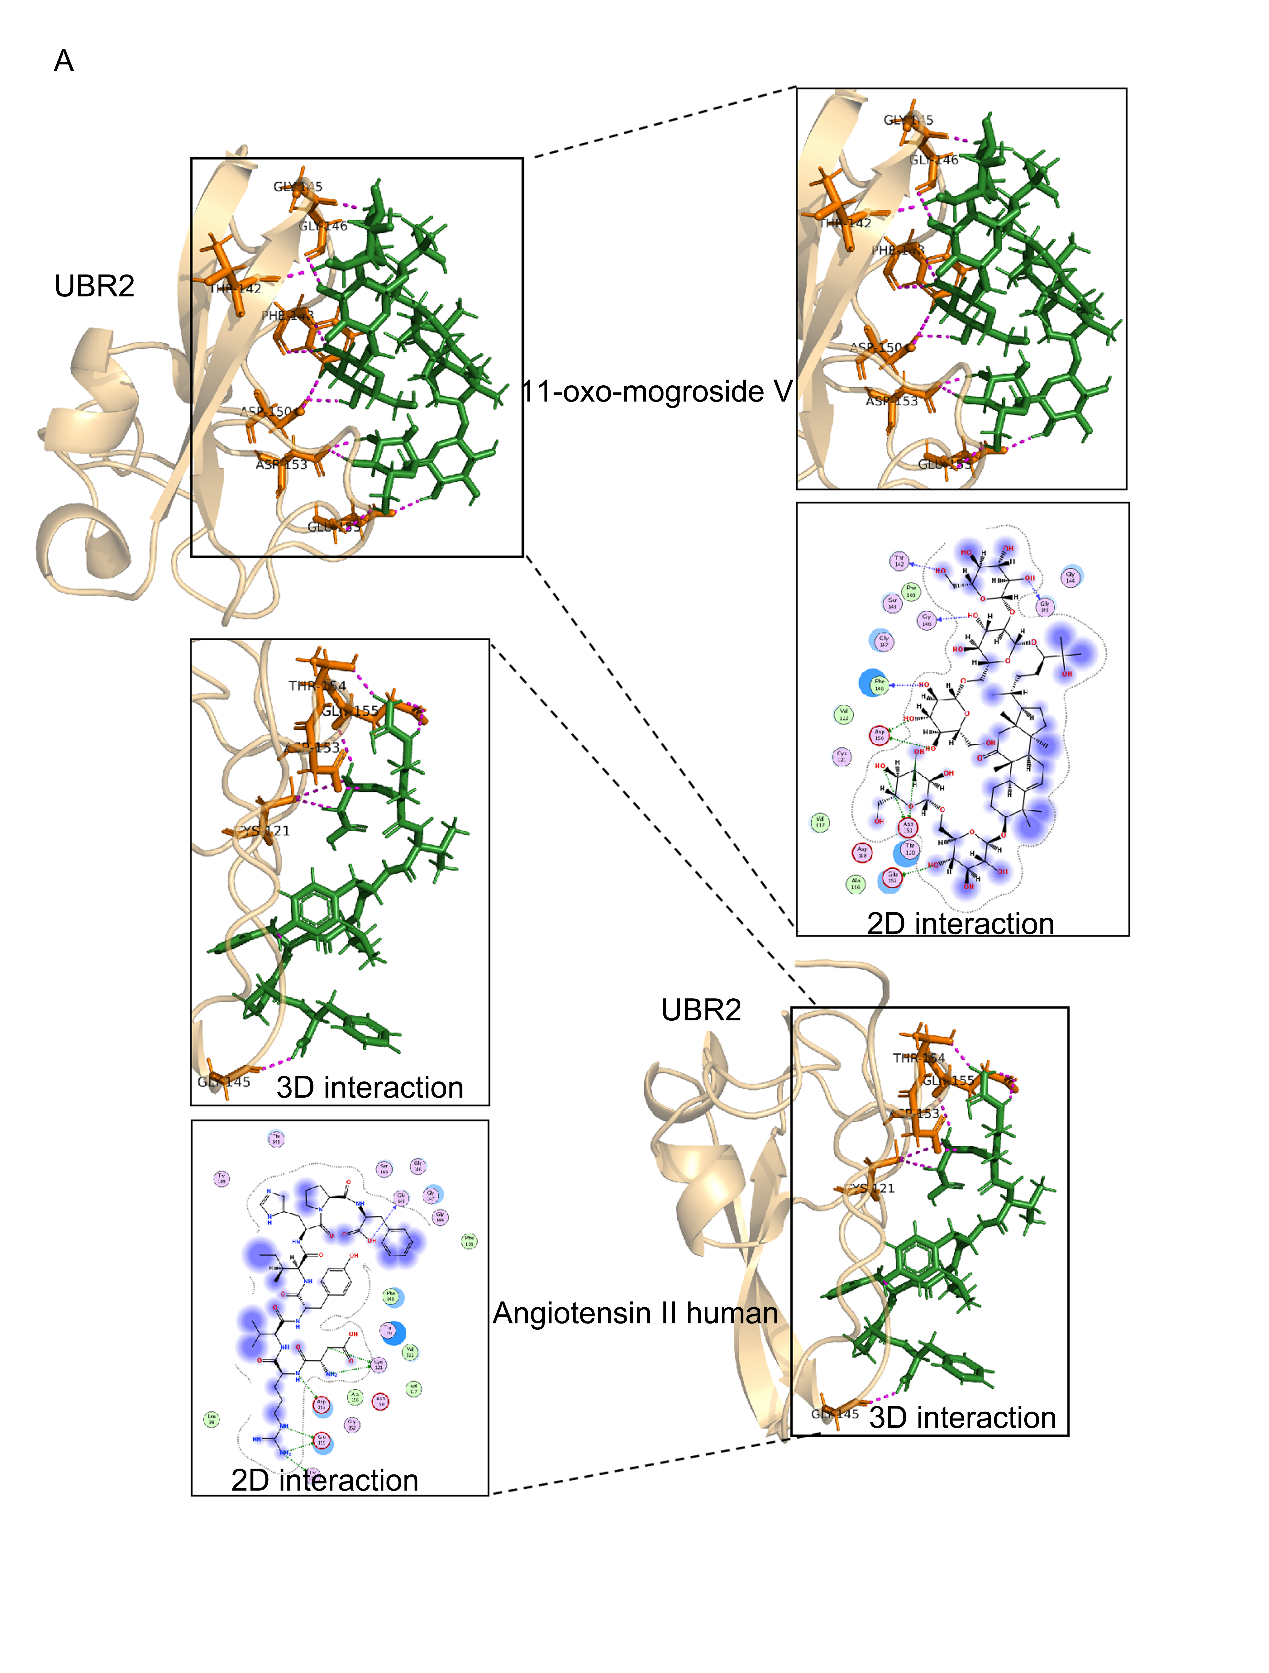


**Supplementary Figure 2 Analysis of the Binding Mode and Interaction Forces between Compound Angiotensin II human and UBR2**

A: The binding mode of the interaction between the small molecule compound Angiotensin II human and the surface of the E3 ubiquitin-protein ligase UBR2 protein. The 3D binding pattern of the specific amino acid residues of UBR2 protein interacting with compound Angiotensin II human. The type of interaction force between UBR2 protein and compound Angiotensin II human.
